# Supplementary material
Source: PubMed Central journal article supplement (PMC6500750)
Supplement: NIHMS1523002-supplement-427_2019_629_MOESM1_ESM.pdf [file NIHMS1523002-supplement-427_2019_629_MOESM1_ESM.pdf]

```

gar 20 ----- 0
zf_ 20 ACGGAGAAGAATTTCTGCTTTTAGGAGCTCTTGTTTCCCAGCCTCCCTCTCCCTGCTT 60

gar 20 -----GCCGCTCTGTCCAGGAACCCAATAAGACACCCCCCCCAAAA--- 45
zf_ 20 GCCGCCTGGCAGGCCCGTGTCAAAGGTGGCTGCTGCAGAACAGACTGTGGGAACAGCC 120
      *** * **** * * * ** ** * ** *
      * * * * *

gar 20 ----- 45
zf_ 20 GGTCAGCCTCCCTGTCCCTATTCCCTAACCCAGAGGGGCAGCCATCAATCCAAGCCTGC 180

gar 20 -----AAAAATCCCCAGCCTTCTACTGAAATAAAATAATCCGC 85
zf_ 20 TCGAACCCCTCCCGGCACACATCCCTGCAACCCACACACTCTCTCCCAATAATCCGC 240
      * * * * * * * * * *

gar 20 GGAAGCAATCTGGGCTCCGCTGGGGTGGCAGCTATTGTCTGCCACAAGCCCTCAATC 145
zf_ 20 GGAAGCAATTTTCTCGACTCGGCTGGGGCCATTGTGCCA-----ACTCCTTCAATC 296
      ***** * ** * ***** * * ** * * * *****

gar 20 TCTCGTAATTAACTCTCCGCGCCGACACTATGCTGGGCAGAAGCACCTCAGTTGTCT 205
zf_ 20 TTTCTAATTAACTCT----- 312
      * * *****

gar 20 CTCCTCCCCTCCCGCCCTCTCGCATTCCGATCTGGGACGTCCCATCACTCCCGGGCAA 265
zf_ 20 -----CGCTTTGTCCCGCATCCGAGTTCTGGACTCATCTCTACGACATTCCG 360
      *** ** ***** * * * ** ** * *

gar 20 -----CGCGGAGGTGGGAGAGGGGAGGCTGACTTCTCCTAATCCCCTCAACCCCTG 318
zf_ 20 ATCGGGCCAGTCTTTGCACTCCCGGCAACCCTCGGACCCTAATCCCCTGCTCCCTC 420
      * * ** ***** * * ***** *****

gar 20 GCACCCCC--AACTCCCCCA----AAACATTTTTTCGGACTGGCGATCACCTACTT- 372
zf_ 20 CCTCCCGAGTAACTCTTACATTTTTTTTTCTTTCCCAACCTGCCGATCACCTACTTG 480
      * ** * ***** ** * * * * * *****

gar 20 -ACTGTTAGTGGGGCATTAAACGCCTGGGTGTTTCTTCTGCGGCAGAGAGGGGGAGAG 431
zf_ 20 CAGATTAAGTAGGGGCATTAACTCCTGGGATTTCTGAAAGAAGAGACGAAGGAGGGG 540
      * ***** ***** * * * * * ***** ** * *

gar 20 TTGTGGAGCACAACAAAACAAAATACACAAATGACTCCGACCAGACAATTAGAACAAGC 491
zf_ 20 GCGAGGAGGA-----GATGGCCAGAAAGCGACTCCAACCCAGACAATTAGAACAATGG 593
      * **** * * * * * ***** *

gar 20 GGGCAGCTGCAGGGGTCTAACCCGCGGCTTACGCCCCG--TTGTGTGGCATTTTGTGAG 550
zf_ 20 GCTGGGCTGTAGGGGCTAACTCGCAGCGTCACGCCTGGACGTTGGGTATTTGTGCGG 653
      * * ** ***** ***** * * * ***** ** * * ***** *

gar 20 TTTAATGAATCGGCCGCTACTCCGACAGCCGCGCTGCCTTCTGAAAGCGCCCGGGA 610
zf_ 20 TTTAATGAATTGTCCGTAGTCCCTGGCTGCATCATAGGC-----CATGTAGAGAG 704
      ***** * ***** * * * * *

gar 20 GCCCCAGTGGGTAGGAGACACTAAGTCGGTATTTATTACACTGCCTTTGTCACTAATTG 670
zf_ 20 TGGACAGCAGGACCCAGACACTAAGTCGGTATTTATTACACTGCCTTTGTCACTAATTG 764
      *** ** *****

gar 20 AGCAAATTACTGACTTCACTGCAGCCCAACAATGGGAGCTGTCGCCTGTGAATGGC 730
zf_ 20 AGCTAATTACTGACTTCTAGCACTCCCAATGACAGTAGCCCTCCACCTCTGCC 824
      *** ***** ***** * ** * ***** * * * * *

gar 20 TGAGTGCTCCCTCCTCTCCTCGCTGTCCCGCCAGCCTCTCGCTTCT----- 782
zf_ 20 TCCCTCATCCACAGTGCC---TGG--GAATTCAGCCTGACTTTGCTTCTTTATCCCTCT 880
      * * **** * * * * * * * * * * * * *

gar 20 -----CTCCCTTCTGCCCCCTC 800
zf_ 20 TTTTTAATCCTTCTGCTTAT- 903
      ***** *

```
